# Supplementary material for: Bioactive Components from Qingwen Baidu Decoction against LPS-Induced Acute Lung Injury in Rats
Source: MDPI journal article supplement (doi:10.3390/molecules22050692), 2017-04-26
Supplement: s1 [file s1]

X13:

The  $^1\text{H}$  and  $^{13}\text{C}$  NMR assignments of X13 were determined on the basis of the  $^1\text{H}$ ,  $^{13}\text{C}$ ,  $^1\text{H}$ - $^1\text{H}$  COSY, HMQC, and HMBC spectra. The  $^1\text{H}$  and  $^{13}\text{C}$  NMR, and ESI-MS data of 1 were identical to those of 1, 2, 3, 4, 6-penta-O-galloyl- $\beta$ -D-glucose ( $\text{C}_{41}\text{H}_{32}\text{O}_{26}$ ) in the literature [1] as follows:  $^1\text{H}$  NMR (DMSO, 600 MHz): d 4.46 (1H, dd,  $J = 10$  Hz, glc. H-6a), 4.75 (1H, m, glc. H-5), 4.46 (1H, d,  $J = 10$  Hz, glc. H-6b), 5.59 (1H, t,  $J = 9.0$ , glc. H-2), 5.61 (1H, t,  $J = 9.0$ , glc. H-4), 6.13 (1H, t,  $J = 9.0$ , glc. H-3), 6.54 (1H, d,  $J = 9.0$ , glc. H-1), 6.93, 6.98, 7.00, 7.07, 7.13 (each 2H, s, galloyl H);  $^{13}\text{C}$  NMR (DMSO, 150 MHz): 91.73 (glc. C-1), 67.79 (glc. C-4), 70.6 (glc. C-2), 71.96 (glc. C-3), 72.16 (glc. C-5), 61.59 (glc. C-6), 108.83, 108.93, 108.78, 108.75, 109.06 (galloyl C-2, C-6), 118.93, 118.13, 118.1, 117.96, 117.38 (galloyl C-1), 138.81, 139.16, 138.95, 139.19, 139.7 (galloyl C-4), 145.6, 145.54, 145.42, 145.15, 145.70 (galloyl C-3, C-5), 165.5, 164.5, 164.9, 164.6, 163.97 ( $-\text{COO}-$ ); ESI-MS  $m/z$  939.1130 $[\text{M}-\text{H}]^-$ , 769.1382 $[\text{M}-\text{H}-\text{C}_7\text{H}_6\text{O}_5]^-$ .

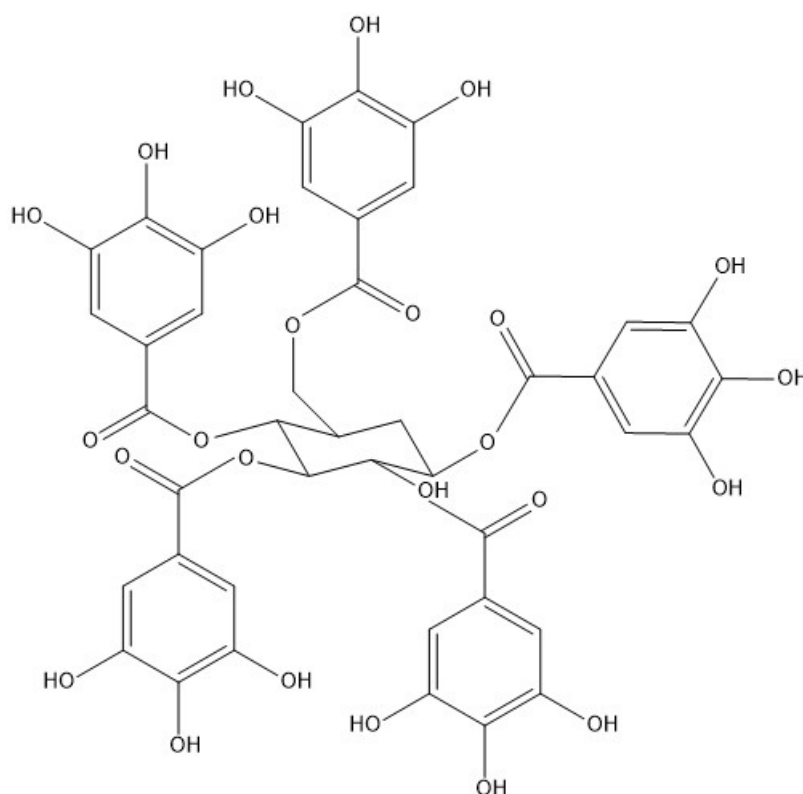

pentagalloylglucose

X6:

The  $^{13}\text{C}$  NMR assignments of X6 were determined on the basis of the  $^{13}\text{C}$  NMR, and ESI-MS data of X6 were identical to those of ethyl gallate ( $\text{C}_9\text{H}_{10}\text{O}_5$ ) in the literature[2] as follows:  $^{13}\text{C}$  NMR (DMSO, 150 MHz): 119.9(C-1), 108.3(C-2), 145.63(C-3), 138.58(C-4), 145.63(C-5), 108.27(C-6), 168.04(C-7), 60.64(C-8), 14.17(C-9). ESI-MS  $m/z$  197.0457 $[\text{M}-\text{H}]^-$ , 168.9350 $[\text{M}-\text{H}-\text{C}_2\text{H}_5]^-$ .

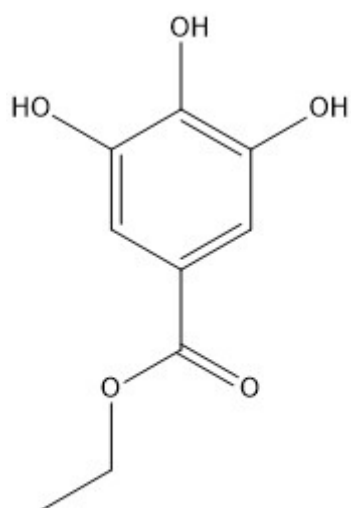

**ethyl gallate**

- [1] J.Y. Cho, M.J. Sohn, J.K. Lee, W.G. Kim. Isolation and identification of pentagalloylglucose with broad-spectrum antibacterial activity from *Rhus trichocarpa* Miquel. *Food Chemistry*, 2010,123: 501–506.
- [2] M. L. Ren. Study on chemical constituents and Bioactivities of *Radix Paeoniae Alba*. SHENYANG PHARMACEUTICAL UNIVERSITY, ShenYang, 2009.
